# Supplementary material
Source: ML conference proceedings conference paper supplement (https://openreview.net/forum?id=DSoFfnmUSjS)
Supplement: supplementary_material [file attachment]

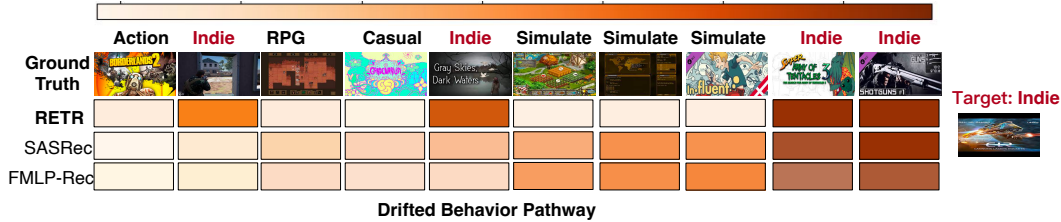

Figure 1: Illustrations of how RETR, SASRec and FMLP-Rec [8] differs on utilizing the historical behaviors of a random user in Steam Dataset. We provide the visualization of behavior heatmaps for RETR, SASRec and FMLP-Rec of a random user in Steam dataset.

## 1 A Further Ablation Study

Table 1: Ablation study of the head number  $h$  for RETR on the Yelp Dataset.

| Model (# $h$ )                   | MRR           |
|----------------------------------|---------------|
| RETR ( $h = 1$ )                 | 0.4310        |
| RETR ( $h = 2$ )                 | 0.4336        |
| <b>RETR (<math>h = 4</math>)</b> | <b>0.4354</b> |
| RETR ( $h = 8$ )                 | 0.4351        |

2 **Number of heads.** In Table 2, we adjust the number of heads for RETR on Yelp. We find that  
 3 the performance first increases rapidly with the growth of the head number and achieves the best  
 4 performance at  $h = 4$ . We perform a similar grid search on other datasets.

Table 2: Ablation study of the maximum sequence length for RETR (**Left**) and SASRec (**Right**). Experiments are conducted on the Beauty Dataset.

| Model (# maximum sequence length ) | MRR           | Model (# maximum sequence length )  | MRR           |
|------------------------------------|---------------|-------------------------------------|---------------|
| RETR ( $N = 25$ )                  | 0.2910        | SASRec ( $N = 25$ )                 | 0.2817        |
| RETR ( $N = 50$ )                  | 0.2979        | <b>SASRec (<math>N = 50</math>)</b> | <b>0.2852</b> |
| <b>RETR (<math>N = 100</math>)</b> | <b>0.3067</b> | SASRec ( $N = 100$ )                | 0.2848        |
| RETR ( $N = 200$ )                 | 0.3058        | SASRec ( $N = 200$ )                | 0.2841        |

5 **Maximum sequence length.** In the Table 2, we adjust the maximum sequence length  $N$  for RETR  
 6 and SASRec on Beauty. As shown in left column of Table 2, we find that the performance of our  
 7 RETR first increases rapidly with the growth of the block number and achieves the best performance  
 8 at  $N = 100$ . We perform a similar grid search on other datasets. On the contrary, as shown in right  
 9 column of Table 2, we find that the performance of SASRec achieves the best performance at  $N = 50$   
 10 and then drops when  $N > 50$ . When  $N = 100$ , our RETR yields better performance compared with  
 11  $N = 50$ . However, the SASRec degenerates when  $N = 100$ . It indicates that our RETR can further  
 12 exploit more useful information from the **longer sequence**.

## 13 B Results on the Beauty, Sports and Toys Dataset

14 Beauty, Sports, and Toys are three subcategories obtained from Amazon review [4] datasets. Our  
 15 RETR can achieve state-of-the-art performance by a large margin on most datasets compared with all  
 16 baseline models on these three datasets. It is noticed that the Beauty, Sports, and Toys are sparse,  
 17 containing less action information. Thus they have lots of noisy logged information. By effectively  
 18 capturing the behavior pathway, our RETR is not affected by this trivial behavior information and  
 19 captures the most informative behavior representation to achieve better performance.

Table 3: Performance comparison of the baselines (PopRec, Caser [6], GRU4Rec [2], BERTRec [5], SASRec [3], SASRec+ [7] and SMRec [1]) and our method on the Beauty, Sports, and Toys. We use HR@10, NDCG@10 and MRR as our metrics. For these three metrics, a higher value indicates a better performance.

| Datasets | Metric  | PopRec | Caser  | GRU4Rec | BERT4Rec | SASRec | SASRec+ | SMRec  | RETR          |
|----------|---------|--------|--------|---------|----------|--------|---------|--------|---------------|
| Beauty   | HR@10   | 0.3386 | 0.3942 | 0.4106  | 0.4739   | 0.4696 | 0.4798  | 0.4826 | <b>0.5034</b> |
|          | NDCG@10 | 0.1803 | 0.2512 | 0.2584  | 0.2975   | 0.3156 | 0.3261  | 0.3238 | <b>0.3425</b> |
|          | MRR     | 0.1558 | 0.2263 | 0.2308  | 0.2614   | 0.2852 | 0.2901  | 0.2918 | <b>0.3067</b> |
| Sports   | HR@10   | 0.3423 | 0.4014 | 0.4299  | 0.4722   | 0.4622 | 0.4776  | 0.4853 | <b>0.5083</b> |
|          | NDCG@10 | 0.1902 | 0.2390 | 0.2527  | 0.2775   | 0.2869 | 0.2987  | 0.3061 | <b>0.3175</b> |
|          | MRR     | 0.1660 | 0.2100 | 0.2191  | 0.2378   | 0.2520 | 0.2635  | 0.2665 | <b>0.2768</b> |
| Toys     | HR@10   | 0.3008 | 0.3540 | 0.3896  | 0.4493   | 0.4663 | 0.4729  | 0.4754 | <b>0.5104</b> |
|          | NDCG@10 | 0.1618 | 0.2183 | 0.2274  | 0.2698   | 0.3136 | 0.3183  | 0.3198 | <b>0.3395</b> |
|          | MRR     | 0.1430 | 0.1967 | 0.1973  | 0.2338   | 0.2842 | 0.2912  | 0.2910 | <b>0.3048</b> |

## 20 Broader Impact

21 **Real-world applications.** This paper studies sequential recommendation from a brand new  
 22 perspective. The social impact of the proposed approach depends on its specific application, as is the  
 23 case in recommendation tasks. Our method achieves consistent state-of-the-art performance in seven  
 24 real-world applications. Thus, our work can be valuable for the community. Overall, we are positive  
 25 about the potential ethical issues of our approach.

26 **Model robustness.** Based on the extensive experiments, we do not find exceptional failure cases.  
 27 However, if the behaviors are extremely casual, RETR and any other models may degenerate.

28 Our work only focuses on the scientific problem, so there is no potential ethical risk.

## 29 References

- 30 [1] Chao Chen, Haoyu Geng, Nianzu Yang, Junchi Yan, Daiyue Xue, Jianping Yu, and Xiaokang Yang. Learning  
 31 self-modulating attention in continuous time space with applications to sequential recommendation. In  
 32 *International Conference on Machine Learning*, pages 1606–1616. PMLR, 2021.
- 33 [2] Balázs Hidasi, Alexandros Karatzoglou, Linas Baltrunas, and Domonkos Tikk. Session-based recommenda-  
 34 tions with recurrent neural networks. *arXiv preprint arXiv:1511.06939*, 2015.
- 35 [3] Wang-Cheng Kang and Julian McAuley. Self-attentive sequential recommendation. In *2018 IEEE Interna-*  
 36 *tional Conference on Data Mining (ICDM)*, pages 197–206. IEEE, 2018.
- 37 [4] Julian McAuley, Christopher Targett, Qinfeng Shi, and Anton Van Den Hengel. Image-based recommenda-  
 38 tions on styles and substitutes. In *Proceedings of the 38th international ACM SIGIR conference on research*  
 39 *and development in information retrieval*, pages 43–52, 2015.
- 40 [5] Fei Sun, Jun Liu, Jian Wu, Changhua Pei, Xiao Lin, Wenwu Ou, and Peng Jiang. Bert4rec: Sequential  
 41 recommendation with bidirectional encoder representations from transformer. In *Proceedings of the 28th*  
 42 *ACM international conference on information and knowledge management*, pages 1441–1450, 2019.
- 43 [6] Jiayi Tang and Ke Wang. Personalized top-n sequential recommendation via convolutional sequence  
 44 embedding. In *Proceedings of the eleventh ACM international conference on web search and data mining*,  
 45 pages 565–573, 2018.
- 46 [7] Da Xu, Chuanwei Ruan, Evren Korpeoglu, Sushant Kumar, and Kannan Achan. Self-attention with  
 47 functional time representation learning. *Advances in neural information processing systems*, 32, 2019.
- 48 [8] Kun Zhou, Hui Yu, Wayne Xin Zhao, and Ji-Rong Wen. Filter-enhanced mlp is all you need for sequential  
 49 recommendation. In *Proceedings of the ACM Web Conference 2022*, pages 2388–2399, 2022.
